# Supplementary material
Source: publisher figshare collection journal article supplement (https://acs.figshare.com/ndownloader/files/14571092)
Supplement: Supplementary file 1 [file 14571092]

## **Supporting information**

**Novel  $\alpha$ -1,3/ $\alpha$ -1,4-glucosidase from *Aspergillus niger* exhibits unique transglucosylation to generate high levels of nigerose and kojibiose**

Min Ma, Masayuki Okuyama,\* Takayoshi Tagami, Asako Kikuchi, Patcharapa Klahan, and Atsuo Kimura\*

Research Faculty of Agriculture, Hokkaido University, Kita-9 Nishi-9, Kita-ku, Sapporo 0608589, Japan

\*Correspondence should be addressed to: Atsuo Kimura (E-mail: kimura@abs.agr.hokudai.ac.jp) or Masayuki Okuyama (E-mail: okuyama@abs.agr.hokudai.ac.jp).

Tel: 81-11-7062808, Fax: 81-11-7062808.

**Table S1. Oligonucleotides used in this study.**

| primer         | sequence (5' → 3' direction) <sup>a</sup> |
|----------------|-------------------------------------------|
| EXT- I         | GGGGTGATCCCAGAGCCAACAT                    |
| EXT- II        | ATTAGCAGTAAGGGCACTATGT                    |
| AgdB-sig/EcoR1 | TTTGAATTCATGTTGGGGTCTTTGCTT               |
| AgdB-his/Xba1  | GGGTCTAGAACTTCAGCTTAAAGTTC                |
| N170D-For      | ACATAC <u>GACT</u> TACACGCGGACCCTTTGG     |
| N170D-Rev      | CGTGTA <u>GTC</u> GTATGTTGGCAAGCGCAT      |
| N185D-For      | ACTCCAG <u>ACA</u> AACACCAACTTGTACGGT     |
| N185D-Rev      | GGTGTT <u>GTC</u> TGGAGTGCCATACGCGTC      |
| N221D-For      | AAGATC <u>GAC</u> CAAACGACAGATGGAAAG      |
| N221D-Rev      | CGTTT <u>GTC</u> GATCTTGATGTCCATACC       |
| N292D-For      | GTCTAC <u>GACT</u> TACAGCCAGGCAAAGATT     |
| N292D-Rev      | GCTGTA <u>GTC</u> GTAGACCACCTCGGCAAG      |
| N354D-For      | GTAAGC <u>GACA</u> AACACGGCATATATCAGC     |
| N354D-Rev      | CGTGTT <u>GTC</u> GCTTACGCTCACAGCCGG      |
| N372D-For      | AATCAG <u>GAC</u> GGTAGCCTATACGAGGGT      |
| N372D-Rev      | GCTACCGT <u>CCT</u> GATTGTGAAGGAAAAC      |

<sup>a</sup>Codons producing the mutations are underlined.



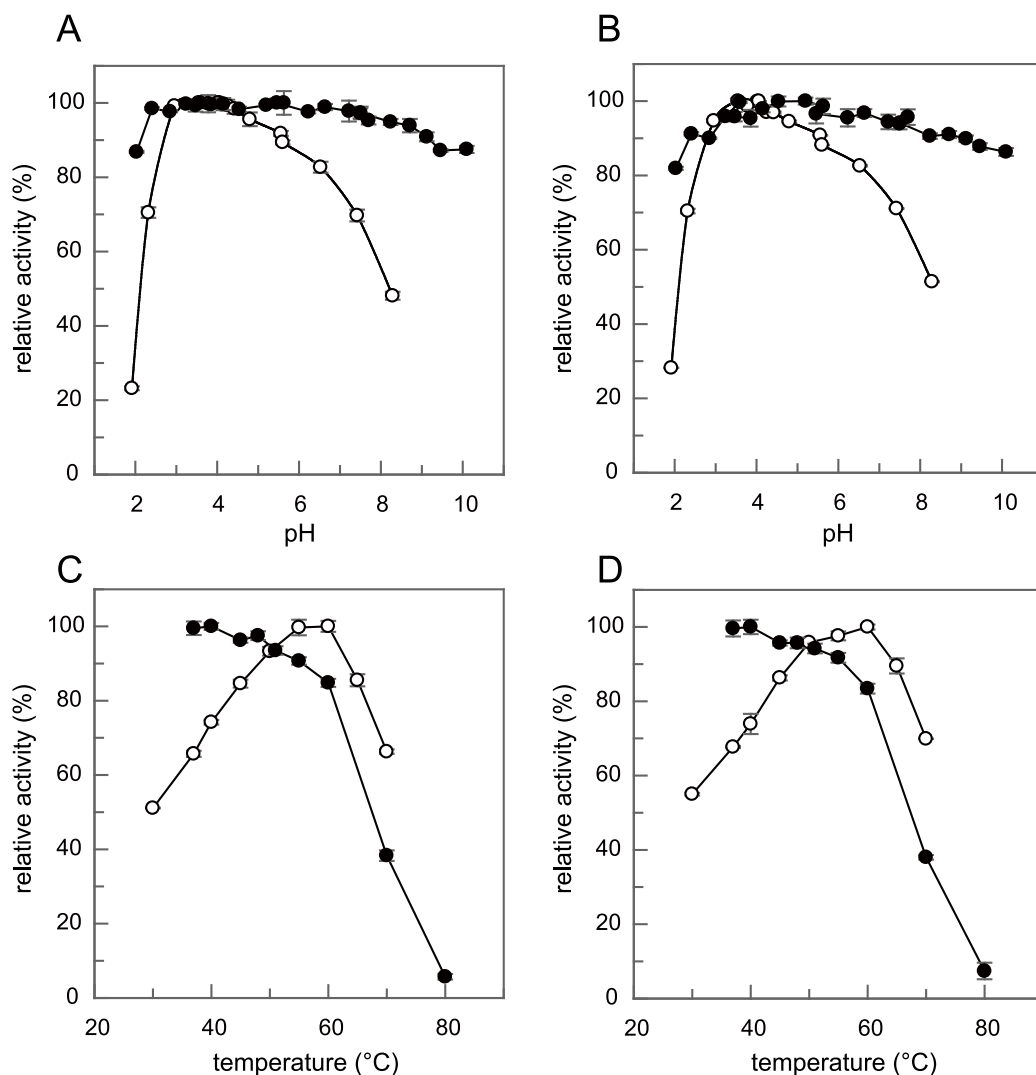

**Figure S2.** pH-activity (open circle) and -stability (closed circle) of (A) rAgdB and (B) N354D, and heat-activity (open circle) and -stability (closed circle) of (C) rAgdB and (D) N354D. The effect of pH on the activity to maltose was determined using the following buffers: 40 mM glycine-HCl (pH 1.9–4.0), 40 mM sodium acetate (pH 3.8–5.6), and citrate-phosphate (pH 5.6–8.3). All buffers contained 0.02% Triton X-100. The enzyme concentrations used were 2.38 nM (rAgdB) and 2.46 nM (N354D). The stability of rAgdB (238 nM) and N354D (246 nM) in various pH was evaluated the residual enzyme activity after an incubation in 20 mM glycine-HCl (pH 2.0–3.6), 20 mM sodium acetate (pH 3.5–5.6), 20 mM citrate-phosphate (pH 5.5–7.7), or 20 mM

glycine-NaOH (pH 7.5–10.1), every buffer contained 0.1% Triton X-100, at 4 °C for 24 h. The effect of temperature on the enzyme activity was determined by the maltose-hydrolytic activity at various temperatures (30–70 °C). The enzyme concentrations used were 1.36 nM (rAgdB) and 1.23 nM (N354D). To estimate the thermal stability, rAgdB (9.51 nM) and N354D (9.19 nM) in 20 mM sodium acetate buffer (pH 5.0) containing 0.1% Triton X-100 were kept at from 37 °C to 80 °C for 15 min, followed by measurement of their residual activities. Experiments were repeated three times and means are plotted (error bar, SD).

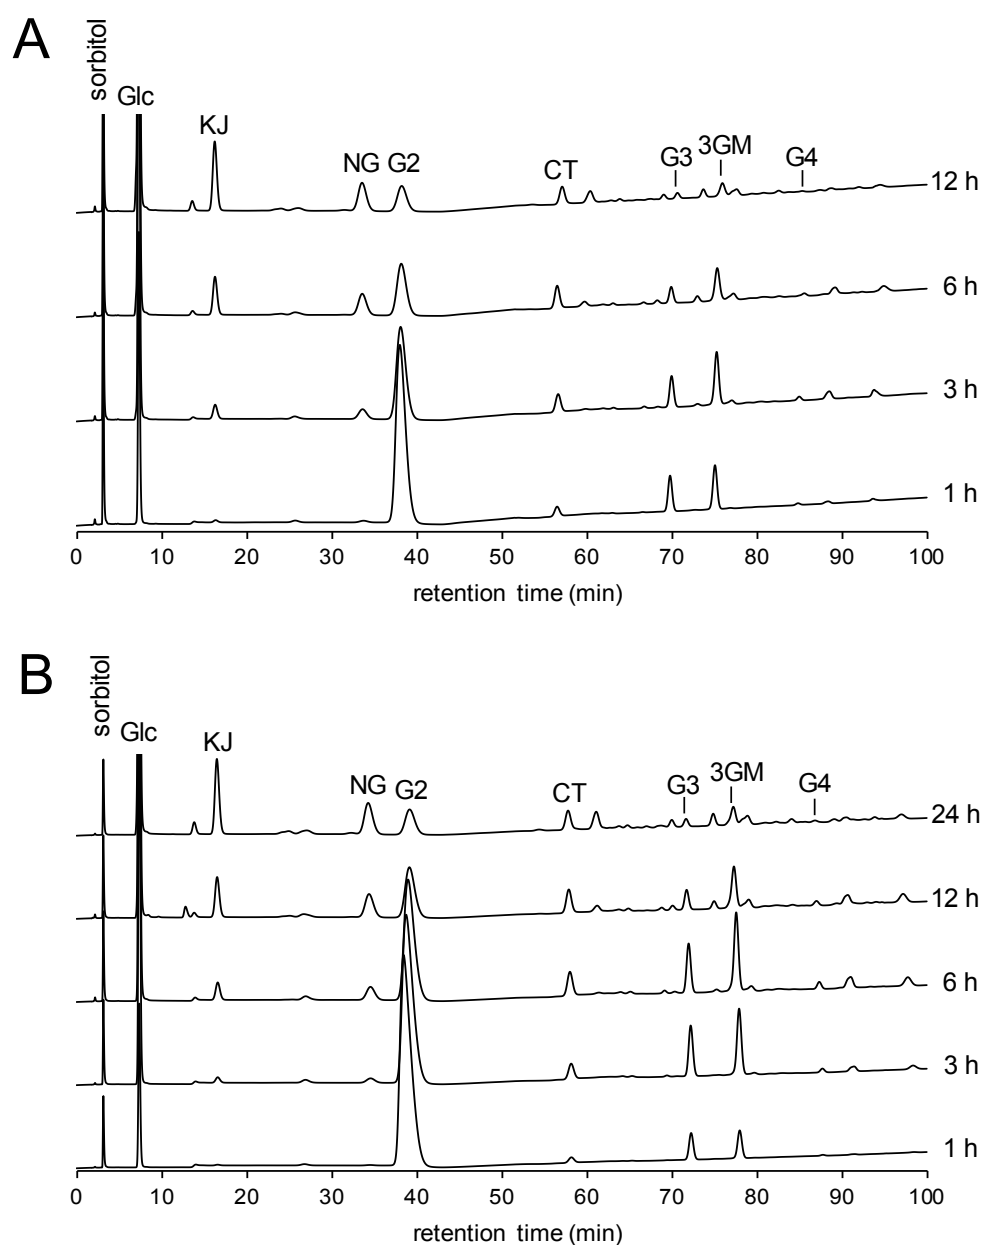

**Figure S3.** N354D-catalyzed transglycosylation of 100 mM or 500 mM G2. (A) HPAEC-PAD profiles of 1, 3, 6, and 12-h reactions of 100 mM G2 and (B) HPAEC-PAD profiles of 1, 3, 6, 12 and 24-h reactions of 500 mM G2. 3GM (3<sup>II</sup>-O- $\alpha$ -glucosyl-maltose); CT (2<sup>I</sup>-O- $\alpha$ -glucosyl-maltose).

## References

- (1) Saitou, N.; Nei, M. The neighbor-joining method: A new method for reconstructing phylogenetic trees. *Mol. Biol. Evol.* **1987**, *4*, 406–425.
- (2) Felsenstein, J. Confidence limits on phylogenies: An approach using the bootstrap. *Evolution* **1985**, *39*, 783–791.
- (3) Zuckerkandl, E.; Pauling, L. Evolutionary divergence and convergence in proteins. In *Evolving Genes and Proteins*; Bryson, V., Vogel, H. J., Eds.; Academic Press: New York, NY, 1965; pp. 97–166.
- (4) Kumar, S.; Stecher, G.; Tamura, K. MEGA7: Molecular Evolutionary Genetics Analysis version 7.0 for bigger datasets. *Mol. Biol. Evol.* **2016**, *33*, 1870–1874.
